# Supplementary material
Source: PubMed Central journal article supplement (PMC2621439)
Supplement: NIHMS46479-supplement-supplement_1.pdf [file NIHMS46479-supplement-supplement_1.pdf]

## **Supplementary Material**

### **A patterned anisotropic nanofluidic sieving structure for continuous-flow separation of DNA and proteins**

Jianping Fu<sup>1,§</sup>, Reto B. Schoch<sup>2,3,§</sup>, Anna L. Stevens<sup>3</sup>, Steven R. Tannenbaum<sup>3</sup>, and  
Jongyoon Han<sup>2,3,\*</sup>

<sup>1</sup>Department of Mechanical Engineering, Massachusetts Institute of Technology,  
Cambridge, Massachusetts 02139, USA

<sup>2</sup>Department of Electrical Engineering and Computer Science, Massachusetts Institute of  
Technology, Cambridge, Massachusetts 02139, USA

<sup>3</sup>Biological Engineering Division, Massachusetts Institute of Technology,  
Cambridge, Massachusetts 02139, USA

<sup>§</sup>Contributed equally to this work. \*Correspondence should be addressed to Jongyoon Han [J. Han (email address: jyhan@mit.edu, Tel: 617-253-2290, Fax: 617-258-5846)]

#### **This supplementary material includes**

Supplementary Text

Supplementary Figures (Fig. S1 and Fig. S2)

Supplementary Video Captions

## Supplementary Text

In the Ogston sieving regime, the nanofilter jump passage rate  $P_x$  for short DNA of a bp number  $N$  can be calculated based on the equilibrium partitioning theory and the Kramer's rate theory<sup>S1</sup>. In the limit of low field, the passage rate  $P_x$  is proportional to  $E_x^2 K/N$ , where  $K$  is the DNA equilibrium partitioning coefficient that is calculated as the ratio of accessible microscopic configuration state integrals within shallow and deep regions across the nanofilter<sup>S1,S2</sup>. Therefore, the relative mobility  $\mu_x^*$  along the  $x$ -axis across the nanofilters can be calculated as<sup>S1</sup>

$$\mu_x^* = \left(1 + \frac{\alpha N}{E_x K}\right)^{-1} \quad (1)$$

where  $\alpha$  is a constant with a unit of V/(m·bp). By definition,  $\mu_x^*$  is the ratio between the mobility  $\mu_x$  along the  $x$ -axis and the maximum sieving free mobility  $\mu_{x,max}$  across a nanofilter<sup>S1</sup>. Thus, the tangent of the stream deflection angle  $\theta$  can be approximately written as

$$\tan \theta = \frac{V_x}{V_y} = \frac{\mu_{x,max}}{\mu_0} \cdot \frac{E_x}{E_y} \cdot \mu_x^* = \frac{\mu_{x,max}}{\mu_0} \cdot \frac{E_x}{E_y} \cdot \left(1 + \frac{\alpha N}{E_x K}\right)^{-1} \quad (2)$$

where  $V_x$  and  $V_y$  are the migration velocities along the positive  $x$ - and negative  $y$ -axis, respectively, and  $\mu_0$  is the free solution mobility. In equation (2), we have implicitly assumed that DNA fragments preserve their free draining property in the ANA deep regions along the  $y$ -axis<sup>S3</sup>.  $\mu_{x,max}/\mu_0$  depends solely on the structural parameters of the ANA<sup>S4</sup>, and  $\mu_{x,max}/\mu_0 = 4d_s d_d / (d_s + d_d)^2 = 0.52$  for the ANA tested in the experiments. The equilibrium partitioning coefficient  $K$  can be calculated as in Ref. (S1). In the limit of short DNA, equation (2) becomes  $\tan \theta = 0.52 E_x / E_y$ , which indicates a sieving free case in the ANA. The experimental data of  $\tan \theta$  for the PCR maker sample in **Supplemental Figure 1** roughly agree with the theoretical curves calculated from equation (2). The best fitting constant  $\alpha$  was found to be fairly constant for the different DNA fragments. The slight deviation of the theoretical curves from the deflection angle data in the low  $E_x$  regime might be attributed to the non-uniformity of  $E_x$  and  $E_y$  in the ANA.

## References

- S1. Fu, J., Yoo, J. & Han, J. Molecular sieving in periodic free-energy landscapes created by patterned nanofilter arrays. *Phys. Rev. Lett.* **97**, art. no. 018103 (2006).
- S2. Giddings, J. C., Kucera, E., Russell, C. P. & Myers, M. N. Statistical theory for the equilibrium distribution of rigid molecules in inert porous networks. Exclusion chromatography. *J. Phys. Chem.* **72**, 4397–4408 (1968).
- S3. Stellwagen, N. C., Gelfi, C. & Righetti, P. G. The free solution mobility of DNA. *Biopolymers* **42**, 687–703 (1997).
- S4. Fu, J., Mao, P. & Han, J. Nanofilter array chip for fast gel-free biomolecule separation. *Appl. Phys. Lett.* **87**, art. no. 263902 (2005).

## Supplementary Figure 1

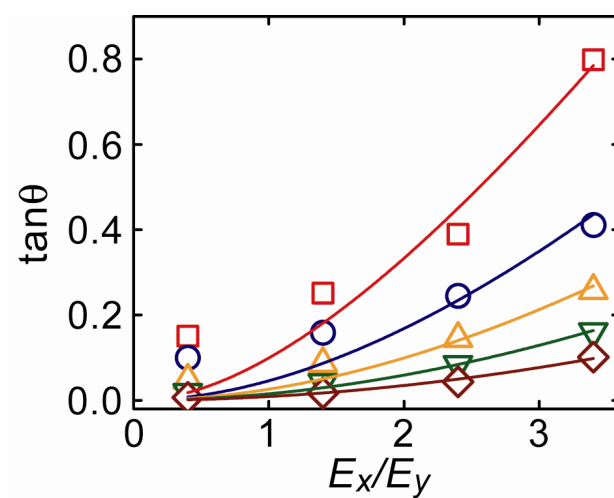

**Figure S1.**  $\tan\theta$  of different streams as a function of  $E_x/E_y$  at fixed  $E_y = 25$  V/cm (50-bp ( $\square$ ), 150-bp ( $\circ$ ), 300-bp ( $\triangle$ ), 500-bp ( $\nabla$ ), 766-bp ( $\diamond$ )). The  $\pm$ s.d. of  $\theta$  derived from the stream half-width are all less than  $1^\circ$ , so statistical error bars for  $\tan\theta$  are not plotted. The colored solid lines are theoretical curves calculated from equation (2) in the **supplemental text**. The best fitting constant  $\alpha$  has a mean about 177.5 and a  $\pm$ s.d. about 12%.

## Supplementary Figure 2

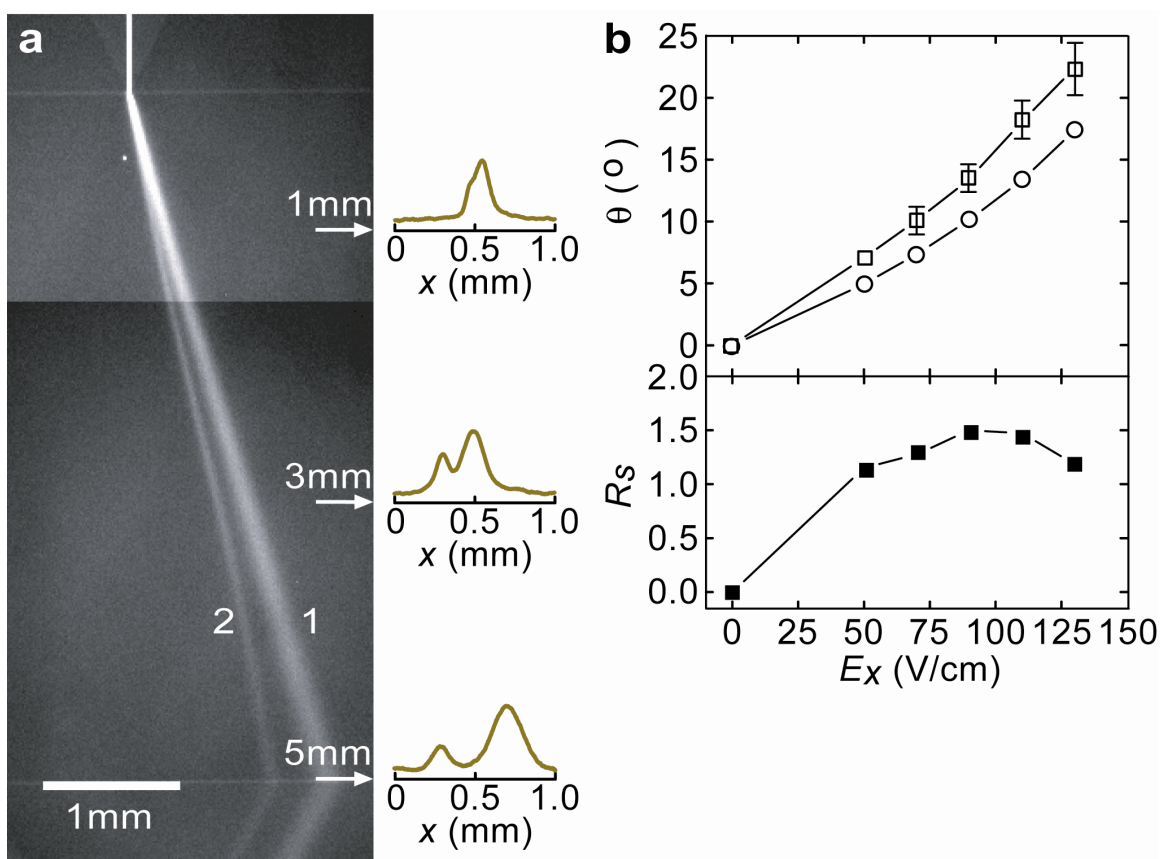

**Figure S2. Continuous-flow separation of proteins under denaturing conditions through the ANA.** **a**, Composite fluorescent photograph showing separation of Alexa Fluor 488-conjugated cholera toxin subunit B (band 1, MW~11.4-kDa) and  $\beta$ -galactosidase (band 2, MW~116.3-kDa) with  $E_x=75$  V/cm and  $E_y=50$  V/cm. The protein stream widths at 1 mm, 3 mm, and 5 mm from the injection point corresponded to resolutions  $R_s$  of 0.57, 0.94 and 1.47, respectively. **b**, Measured deflection angle  $\theta$  (top) of cholera toxin subunit B ( $\square$ ) and  $\beta$ -galactosidase ( $\circ$ ) as a function of  $E_x$  when  $E_y=50$  V/cm. The bottom shows the corresponding separation resolutions. The  $\pm$ s.d. of  $\theta$  are indicated as error bars (drawn if larger than the symbol).

## Supporting Videos

**Movie S1. Continuous-flow separation of the PCR marker in the ANA, with the Ogston-sieving mechanism.** This video corresponds to the still images shown in **Fig. 3a–b**, with exposure time of 1300 ms/image and image size of  $1300\ \mu\text{m} \times 1620\ \mu\text{m}$ . The time scale in this movie has been compressed by a factor of 20. At the beginning of the movie, only  $E_y=25\ \text{V/cm}$  was applied. The orthogonal field  $E_x=35\ \text{V/cm}$  was applied at 3 sec in the movie, and the separation was finished at about 12 sec in the movie. Video contributed by Jianping Fu.

**Movie S2. Continuous-flow separation of  $\lambda$  DNA – Hind III digest in the ANA, with the entropic trapping mechanism.** This video corresponds to the still images shown in **Fig. 4a–b**, with exposure time of 600 ms/image and image size of  $3270\ \mu\text{m} \times 4080\ \mu\text{m}$ . The time scale in this movie has been compressed by a factor of 20. At the beginning of the movie, only  $E_y=100\ \text{V/cm}$  was applied. The orthogonal field  $E_x=185\ \text{V/cm}$  was applied at 1 sec in the movie, and the separation was finished at about 5 sec in the movie. Video contributed by Jianping Fu.

**Movie S3. Continuous-flow separation of proteins under denaturing conditions in the ANA.** This video corresponds to the still images shown in **Fig. S2a**, with exposure time of 1000 ms/image and image size of  $3270\ \mu\text{m} \times 4080\ \mu\text{m}$ . The time scale in this movie has been compressed by a factor of 20. At the beginning of the movie, only the vertical field  $E_y=50\ \text{V/cm}$  was applied. The horizontal field  $E_x=75\ \text{V/cm}$  was applied at 1 sec in the movie, and the separation was finished at about 6 sec in the movie. Video contributed by Jianping Fu.
